# Supplementary material
Source: publisher site journal article supplement (https://www.dovepress.com/article/435578)
Supplement: Supplementary file 1 [file get_supplementary_file.php]

APPENDIX A

*The 28 statements about social media that were initially used in the exploratory analysis*

| Item | Description |
| --- | --- |
| v1 | Social media takes away focus from more important things |
| v2 | I am addicted to social media |
| v3 | My parents/guardians think I spend too much time on social media |
| v4 | I fear I might miss out on something if I’m not on social media |
| v5 | Social media gives me a sense of control or overview of what is going on |
| v6 | I spend too much time on social media |
| v7 | I wish to reduce the amount of time I spend on social media |
| v8 | It's easier to be myself on social media |
| v9 | I have several profiles or usernames on the same platform |
| v10 | I am concerned with making sure that what I do online cannot be linked to my name |
| v11 | There are pictures / video / other of me on the internet that I do not want others to see |
| v12 | I feel that I must like and/or comment on what my friends post on social media |
| v13 | I feel that I have to respond to all messages, "streaks" and similar things I receive |
| v14 | If I do not respond, like or comment, then it can have negative consequences |
| v15 | If my friends don’t like or comment what I post on social media, I start thinking something is wrong |
| v16 | I turn the phone on silent / "do not disturb" in situations where I have to concentrate / get something done |
| v17 | I prefer to talk to people through social media rather than in real life |
| v18 | There is so much happening on social media that I often feel overwhelmed |
| v19 | I wish we could learn more about how social media affects us |
| v20 | If I don’t participate on social media, I’ll fall behind |
| v21 | It's easier for me to talk about difficult things through social media |
| v22 | I often end up in quarrels or misunderstandings based on misinterpretations of what I have sent / shared |
| v23 | I find it difficult to interpret what people write / send |
| v24 | I pay close attention to what my friends/boyfriend/girlfriend/family does through social media (for example stories, Snap map…) |
| v25 | Sometimes I feel like I’m being monitored on social media (because what I do/where I am/who I’m with, is visible) |
| v26 | I have done / written things on social media that I would never do in real life |
| v27 | It does not matter to me how many likes or comments I get on social media |
| v28 | I like to have periods where I do not have access to social media |

APPENDIX B

*Correlation matrix of included variables*

| Variable | 1 | 2 | 3 | 4 | 5 | 6 | 7 | 8 |
| --- | --- | --- | --- | --- | --- | --- | --- | --- |
|  |  |  |  |  |  |  |  |  |
| 1. Gender |  |  |  |  |  |  |  |  |
|  |  |  |  |  |  |  |  |  |
| 2. Age | -.34 |  |  |  |  |  |  |  |
|  |  |  |  |  |  |  |  |  |
| 3. Subjective overuse | .26 | -.44 |  |  |  |  |  |  |
|  |  |  |  |  |  |  |  |  |
| 4. Social obligations | .49 | -.54 | .70* |  |  |  |  |  |
|  |  |  |  |  |  |  |  |  |
| 5. Source of concern | .30 | -.30 | .60 | .67* |  |  |  |  |
|  |  |  |  |  |  |  |  |  |
| 6. Symptoms of depression | .33 | -.23 | .15 | .28 | .29 |  |  |  |
|  |  |  |  |  |  |  |  |  |
| 7. Symptoms of anxiety | .26 | -.20 | .07 | .22 | .28 | .87** |  |  |
|  |  |  |  |  |  |  |  |  |
| 8. Mental well-being | -.35 | -.17 | -.28 | -.28 | -.34 | -.75* | -.69* |  |
|  |  |  |  |  |  |  |  |  |
| 9. Time spent on social media | .05 | -.29 | .34 | .17 | -.09 | .05 | .02 | -.32 |
|  |  |  |  |  |  |  |  |  |

*Note.* * indicates *p* < .05. ** indicates *p* < .01.

APPENDIX C

*Distribution of social media platforms used by the participants divided by gender*

|  | Boys (N = 899) | Girls (N = 1124) |
| --- | --- | --- |
| Facebook | 504 (56%) | 757 (67%) |
| Instagram | 755 (84%) | 1083 (96%) |
| Snapchat | 817 (91%) | 1095 (97%) |
| LinkedIn | 16 (2%) | 3 (0%) |
| Twitter | 270 (30%) | 171 (15%) |
| YouTube | 818 (91%) | 879 (78%) |
| Pinterest | 40 (4%) | 423 (38%) |
| Messenger | 487 (54%) | 783 (70%) |
| WhatsApp | 54 (6%) | 102 (9%) |
| Jodel | 53 (6%) | 81 (7%) |
| TikTok | 536 (60%) | 911 (81%) |
| Discord | 416 (46%) | 92 (8%) |
| Twitch | 223 (25%) | 42 (4%) |
| Spond | 130 (14%) | 132 (12%) |
| Anonymous (…) | 11 (1%) | 6 (1%) |
| Datingapp | 75 (8%) | 154 (14%) |
| Houseparty | 17 (2%) | 30 (3%) |
| Reddit | 276 (31%) | 61 (5%) |
| Annet | 89 (10%) | 105 (9%) |

APPENDIX D

*Percentiles of the factors “Subjective overuse”, “Social obligations”, and “Source of concern”*

|  |  |  | 25th Percentile | | 50th Percentile | | 75th Percentile | |
| --- | --- | --- | --- | --- | --- | --- | --- | --- |
|  | Min | Max | Score | Mean score | Score | Mean score | Score | Mean score |
| Subjective overuse | 5 | 25 | 12 | 2.4 | 15 | 3.0 | 18 | 3.6 |
| Social obligations | 8 | 40 | 16 | 2.0 | 21 | 2.6 | 26 | 3.3 |
| Source of concern | 3 | 15 | 5 | 1.7 | 7 | 2.3 | 9 | 3.0 |

*Note.* Min=minimum value of each factor, Max= maximum value of each factor

APPENDIX E

**Detailed results of multiple regression analysis**

This is the results from the gender-adjusted multiple regression models. The gender-adjusted model including subjective overuse as a predictor explained 13 % (R2=.126, F(2, 1882)=137.5, p<.001) of the variance for depression, 10 % (R2=.102, F(2, 1911)=109.6, p<.001) of the variance for anxiety, 9 % (R2=.089, F(2, 1844)=91.23, p<.001) of the variance for well-being and 13 % (R2=.130, F(2, 1944)=147.6, p<.001) of the variance for time spent on social media. The gender-adjusted model including social obligations as a predictor explained 14 % (R2=.142, F(2, 1834)=153.8, p<.001) of the variance for depression, 12 % (R2=.120, F(2, 1866)=127.8, p<.001) of the variance for anxiety, 10 % (R2=.095, F(2, 1799)=96.62, p<.001) of the variance for well-being and 7 % (R2=.074, F(2, 1895)=77.19, p<.001) of the variance for time spent on social media. The gender-adjusted model including source of concern as a predictor explained 15 % (R2=.149, F(2, 1850)=163.7, p<.001) of the variance for depression, 14 % (R2=.142, F(2, 1881)=156.9, p<.001) of the variance for anxiety, 11 % (R2=.106, F(2, 1817)=109.8, p<.001) of the variance for well-being and 4 % (R2=.037, F(2, 1913)=38.52, p<.001) of the variance for time spent on social media. When subjective overuse, social obligations and source of concern were included as predictors in the same gender-adjusted model, the model explained 17 % of the variance for depression (R2=.165, F(4, 1791)=89.68, p<.001), 15 % of the variance for anxiety (R2=.148, F(4, 1823)=80.92, p<.001), 11 % of the variance for well-being (R2=.106, F(4, 1760)=53.66, p<.001), and 14 % of the variance for time spent on social media (R2=.143, F(4, 1852)=78.56, p<.001).
